# Supplementary figures and images for: Stable water isotope signals in tropical ice clouds in the West African monsoon simulated with a regional convection-permitting model
Source: Copernicus journal article supplement (doi:10.5194/acp-2021-902), 2021-12-03

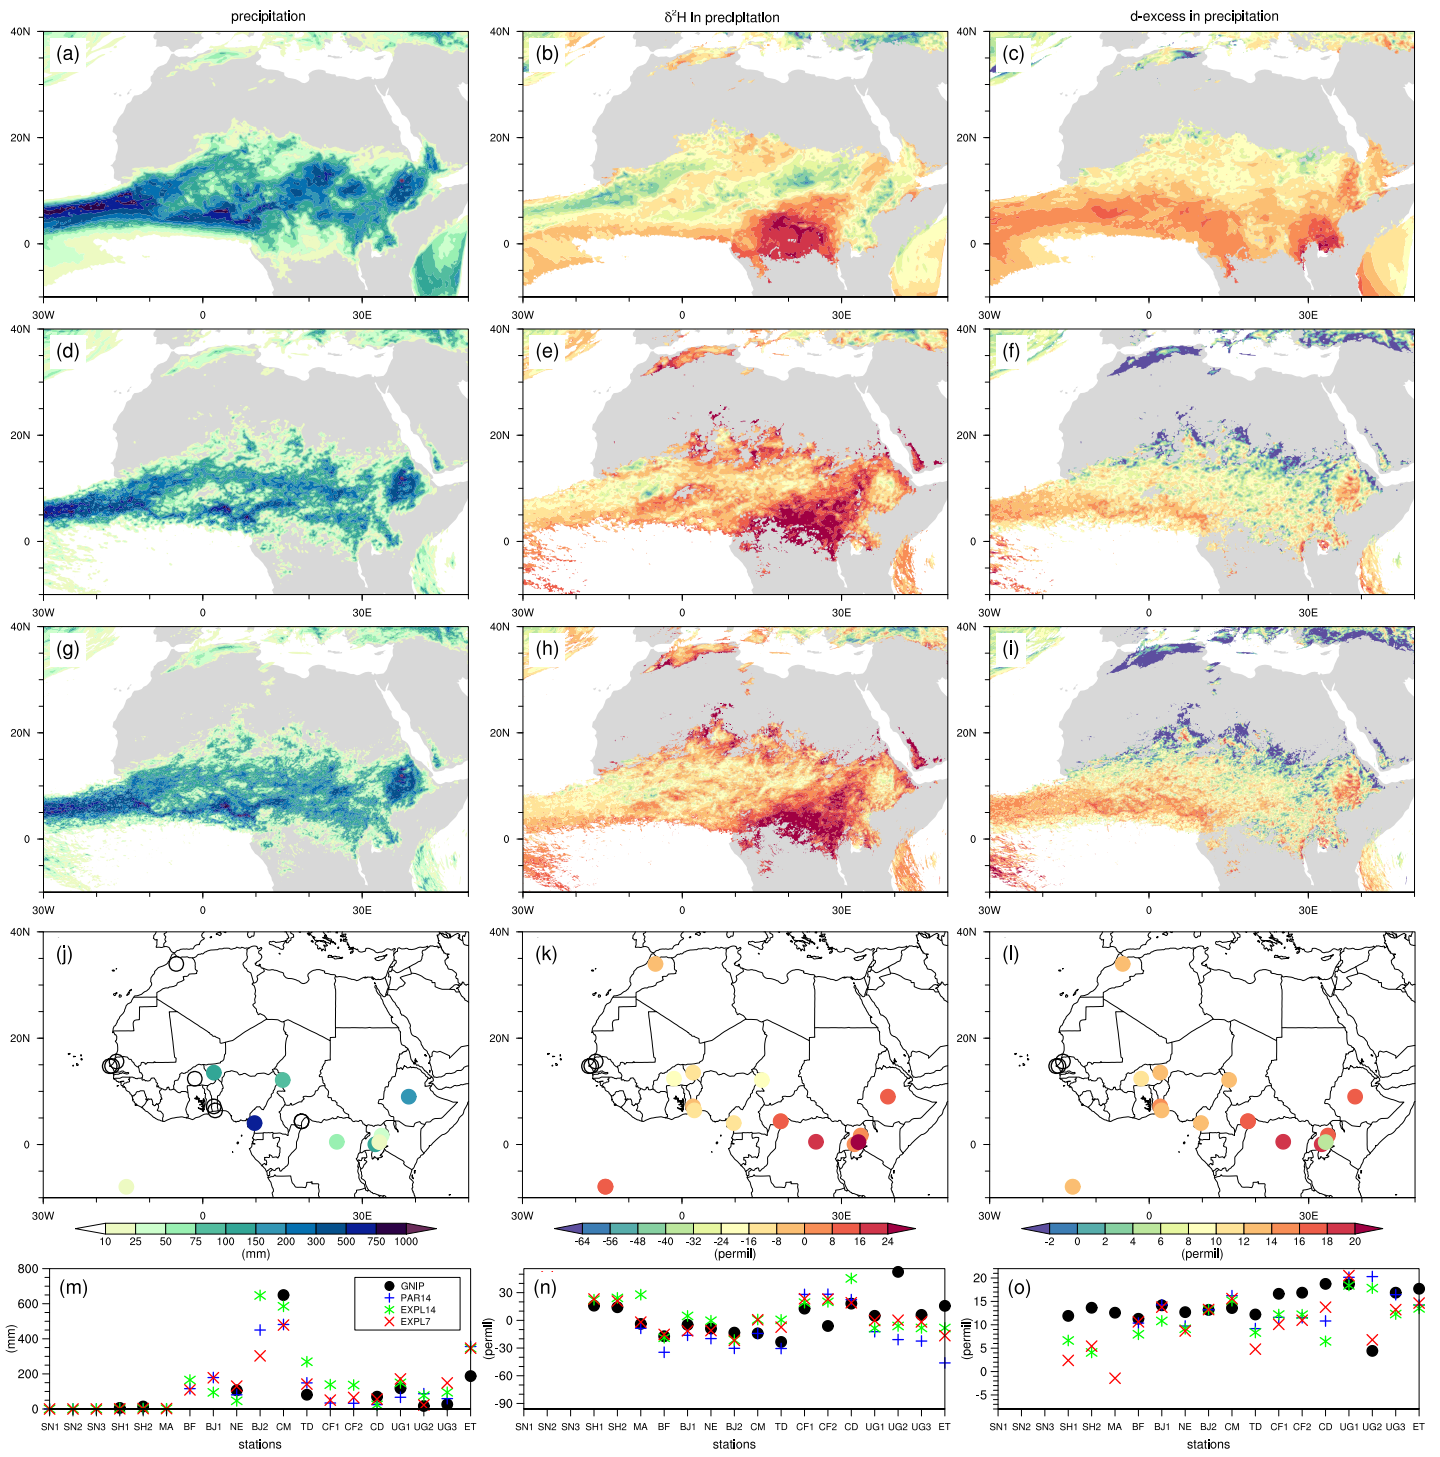

Figure S1. As Fig. 2, but for June 2016.

Supplement: Supplementary file 1 [file acp-2021-902-supplement.pdf]
